# Supplementary material
Source: ML conference proceedings conference paper supplement (https://openaccess.thecvf.com/content/CVPR_2020/html/Mustikovela_Self-Supervised_Viewpoint_Learning_CVPR_2020_paper.html)
Supplement: Supplementary file 1 [file Mustikovela_Self-Supervised_Viewpoint_Learning_CVPR_2020_supplemental.zip]

# Supplementary Material for Self-Supervised Viewpoint Learning From Image Collections

Siva Karthik Mustikovela<sup>1,2\*</sup> Varun Jampani<sup>1</sup> Shalini De Mello<sup>1</sup>  
Sifei Liu<sup>1</sup> Umar Iqbal<sup>1</sup> Carsten Rother<sup>2</sup> Jan Kautz<sup>1</sup>  
<sup>1</sup>NVIDIA <sup>2</sup>Heidelberg University

{siva.mustikovela, carsten.rother}@iwr.uni-heidelberg.de; varunjampani@gmail.com;  
{shalinig, sifeil, uiqbal, jkautz}@nvidia.com

## 1. Overview

In this supplement, we provide the architectural and training details of our SSV framework. In Section 2 we describe the architectures of the both viewpoint ( $\mathcal{V}$ ) and synthesis ( $\mathcal{S}$ ) networks. In Section 3 we present the various training hyperparameters and the training schedule. In Section 4 we examine the memory requirements and runtime of SSV. In Section 5 we provide additional visual viewpoint estimation results for all object categories (*i.e.*, face, car, bus and train).

## 2. Network Architecture

The network architectures of the viewpoint and synthesis networks are detailed in tables 1 and 2, respectively. Both  $\mathcal{V}$  and  $\mathcal{S}$  operate at an image resolution of 128x128 pixels.  $\mathcal{V}$  has an input size of 128x128.  $\mathcal{S}$  synthesizes images at the same resolution. We use Instance Normalization [4] in the viewpoint network. For the synthesis network, the size of the style code  $z_s$  is 128 for faces and 200 for the other objects (car, bus and train).  $z_s$  is mapped to affine transformation parameters  $(\gamma(z_s), \sigma(z_s))$ , which are in turn used by adaptive instance normalization(AdaIN) [1] to control the style of the synthesized images.

## 3. Training Details

SSV is implemented in Pytorch [3]. We open-source our code required to reproduce the results at <https://github.com/NVlabs/SSV>. We train both our viewpoint and synthesis networks from scratch by initializing all weights with a normal distribution  $\mathcal{N}(0, 0.2)$  and zero bias. The learning rate is 0.0001 for both ( $\mathcal{V}$ ) and ( $\mathcal{S}$ ). We use the ADAM [2] optimizer with betas (0.9, 0.99) and no weight decay. We train the networks for 20 epochs.

**Training Cycle** In each training iteration, we optimize  $\mathcal{V}$  and  $\mathcal{S}$  alternatively. In the  $\mathcal{V}$  optimization step, we compute the generative consistency, discriminator loss and the symmetry constraint (Sections 3.1, 3.2, 3.3 in the main paper). We freeze the parameters of  $\mathcal{S}$ , compute the gradients of the losses with respect to parameters of  $\mathcal{V}$  and do an update step for it. In an alternative step, while optimizing  $\mathcal{S}$ , we compute the paired style and viewpoint consistency, flip image consistency and the adversarial loss (Section 4 in the paper). We freeze the parameters of  $\mathcal{V}$ , compute the gradients of the losses with respect to parameters of  $\mathcal{S}$  and do an update step for it. We train separate networks for each object category.

## 4. Runtime and Memory

Our viewpoint network  $\mathcal{V}$  runs real-time with 76 FPS. That is, the inference takes 13 milliseconds on an NVIDIA Titan X Pascal GPU for a single image. The memory consumed is 900MB. We use a small network for viewpoint estimation for real-time performance and low-memory consumption.

---

\*Siva Karthik Mustikovela was an intern at NVIDIA during the project.

|                 | Layer                       | Kernel Size | stride | Activation | Normalization | Output Dimension |
|-----------------|-----------------------------|-------------|--------|------------|---------------|------------------|
|                 | Conv                        | 1x1         | 1      | LReLU      | -             | 128x128x128      |
|                 | Conv2D                      | 3x3         | 1      | LReLU      | Instance Norm | 128X128x256      |
|                 | Conv2D                      | 3x3         | 1      | LReLU      | Instance Norm | 128X128x256      |
| Backbone Layers | Interpolate (scale = 0.5)   |             |        |            |               |                  |
|                 | Conv2D                      | 3x3         | 1      | LReLU      | Instance Norm | 64X64x512        |
|                 | Conv2D                      | 3x3         | 1      | LReLU      | Instance Norm | 64X64x512        |
|                 | Interpolate (scale = 0.5)   |             |        |            |               |                  |
|                 | Conv2D                      | 3x3         | 1      | LReLU      | Instance Norm | 32X32x512        |
|                 | Conv2D                      | 3x3         | 1      | LReLU      | Instance Norm | 32X32x512        |
|                 | Interpolate (scale = 0.5)   |             |        |            |               |                  |
|                 | Conv2D                      | 3x3         | 1      | LReLU      | Instance Norm | 16X16x512        |
|                 | Conv2D                      | 3x3         | 1      | LReLU      | Instance Norm | 16X16x512        |
|                 | Interpolate (scale = 0.5)   |             |        |            |               |                  |
|                 | Conv2D                      | 3x3         | 1      | LReLU      | Instance Norm | 8X8x512          |
|                 | Conv2D                      | 3x3         | 1      | LReLU      | Instance Norm | 8X8x512          |
|                 | Interpolate (scale = 0.5)   |             |        |            |               |                  |
|                 | Conv2D                      | 3x3         | 1      | LReLU      | Instance Norm | 4X4x512          |
|                 | Conv2D                      | 4x4         | 1      | LReLU      | -             | 1X1x512          |
|                 | Backbone output             |             |        |            |               |                  |
|                 | FC-real/fake                | -           | -      | -          | -             | 1                |
|                 | FC-style                    | -           | -      | -          | -             | code_dim         |
| Azimuth         | FC                          | -           | -      | LReLU      | -             | 256              |
|                 | FC - $ \hat{a} $            | -           | -      | -          | -             | 2                |
|                 | FC - $\text{sign}(\hat{a})$ | -           | -      | -          | -             | 4                |
| Elevation       | FC                          | -           | -      | LReLU      | -             | 256              |
|                 | FC - $ \hat{e} $            | -           | -      | -          | -             | 2                |
|                 | FC - $\text{sign}(\hat{e})$ | -           | -      | -          | -             | 4                |
| Tilt            | FC                          | -           | -      | LReLU      | -             | 256              |
|                 | FC - $ \hat{e} $            | -           | -      | -          | -             | 2                |
|                 | FC - $\text{sign}(\hat{e})$ | -           | -      | -          | -             | 4                |

Table 1. **Viewpoint Network Architecture.** The network contains a backbone whose resultant fully-connected features are shared by the heads that predict (a) real/fake scores, (b) style codes, and (c) heads that predict azimuth, elevation and tilt values. All LReLU units have a slope of 0.2. FC indicates a fully connected layer.

## 5. Visual Results

In figures 1, 2, 4, we present some additional visual results for the various object categories (faces, cars, buses and trains). It can be seen that the viewpoint estimation network reliably predicts viewpoint. For cars, it generalizes to car models like race cars and formula-1 cars, which are not seen by SSV during training. In each figure, we also show some failure cases in the last row. For faces, We observe that failures are caused in cases where the viewpoints contain extreme elevation or noisy face detection. For cars, viewpoint estimation is noisy when there is extreme blur in the image or the if the car is heavily occluded to the extent where it is difficult to identify it as a car. For buses, viewpoint estimation is erroneous when there is ambiguity between the rear and front parts of the object.

|                   | Layer                   | Kernel Size | stride | Activation | Normalization | Output Dimension |
|-------------------|-------------------------|-------------|--------|------------|---------------|------------------|
|                   | Input - 3D Code         | -           | -      | -          | -             | 4x4x4x512        |
| Stylized 3D Convs | Conv 3D                 | 3x3         | 1      | LReLU      | AdaIN         | 4x4x4x512        |
|                   | Conv 3D                 | 3x3         | 1      | LReLU      | AdaIN         | 4x4x4x512        |
|                   | Interpolate (scale = 2) |             |        |            |               |                  |
|                   | Conv 3D                 | 3x3         | 1      | LReLU      | AdaIN         | 8x8x8x512        |
|                   | Conv 3D                 | 3x3         | 1      | LReLU      | AdaIN         | 8x8x8x512        |
|                   | Interpolate (scale = 2) |             |        |            |               |                  |
|                   | Conv 3D                 | 3x3         | 1      | LReLU      | AdaIN         | 16x16x16x256     |
|                   | Conv 3D                 | 3x3         | 1      | LReLU      | AdaIN         | 16x16x16x256     |
|                   | 3D Rotation             |             |        |            |               |                  |
|                   | Conv 3D                 | 3x3         | 1      | LReLU      | -             | 16x16x16x128     |
| Project           | Conv 3D                 | 3x3         | 1      | LReLU      | -             | 16x16x16x128     |
|                   | Conv 3D                 | 3x3         | 1      | LReLU      | -             | 16x16x16x64      |
|                   | Conv 3D                 | 3x3         | 1      | LReLU      | -             | 16x16x16x64      |
|                   | Conv 3D                 | 3x3         | 1      | LReLU      | -             | 16x16x16x64      |
|                   | Collapse                | -           | -      | -          | -             | 16x16x(16.64)    |
|                   | Conv                    | 3x3         | 1      | LReLU      | -             | 16x16x1024       |
|                   | Conv 2D                 | 3x3         | 1      | LReLU      | AdaIN         | 16x16x512        |
|                   | Conv 2D                 | 3x3         | 1      | LReLU      | AdaIN         | 16x16x512        |
|                   | Interpolate (scale = 2) |             |        |            |               |                  |
|                   | Conv 2D                 | 3x3         | 1      | LReLU      | AdaIN         | 32x32x256        |
| Stylized 2D Convs | Conv 2D                 | 3x3         | 1      | LReLU      | AdaIN         | 32x32x256        |
|                   | Interpolate (scale = 2) |             |        |            |               |                  |
|                   | Conv 2D                 | 3x3         | 1      | LReLU      | AdaIN         | 64x64x128        |
|                   | Conv 2D                 | 3x3         | 1      | LReLU      | AdaIN         | 64x64x128        |
|                   | Interpolate (scale = 2) |             |        |            |               |                  |
|                   | Conv 2D                 | 3x3         | 1      | LReLU      | AdaIN         | 128x128x64       |
|                   | Conv 2D                 | 3x3         | 1      | LReLU      | AdaIN         | 128x128x64       |
|                   | Interpolate (scale = 2) |             |        |            |               |                  |
|                   | Conv 2D                 | 3x3         | 1      | LReLU      | AdaIN         | 128x128x64       |
|                   | Conv 2D                 | 3x3         | 1      | LReLU      | AdaIN         | 128x128x64       |
| Out               | Conv 2D                 | 3x3         | 1      | -          | -             | 128x128x3        |

Table 2. **Synthesis Network Architecture.** This network contains a set of 3D and 2D convolutional blocks. A learnable 3D latent code is passed through stylized 3D convolution blocks, which also use style codes as inputs to their adaptive instance normalization(AdaIN [1]) layers. The resulting 3D features are then rotated using a rigid rotation via the input viewpoint. Following this, the 3D features are orthographically projected to become 2D features. These are then passed through a stylized 2D convolution network which has adaptive instance normalization layers to control the style of the synthesized image.

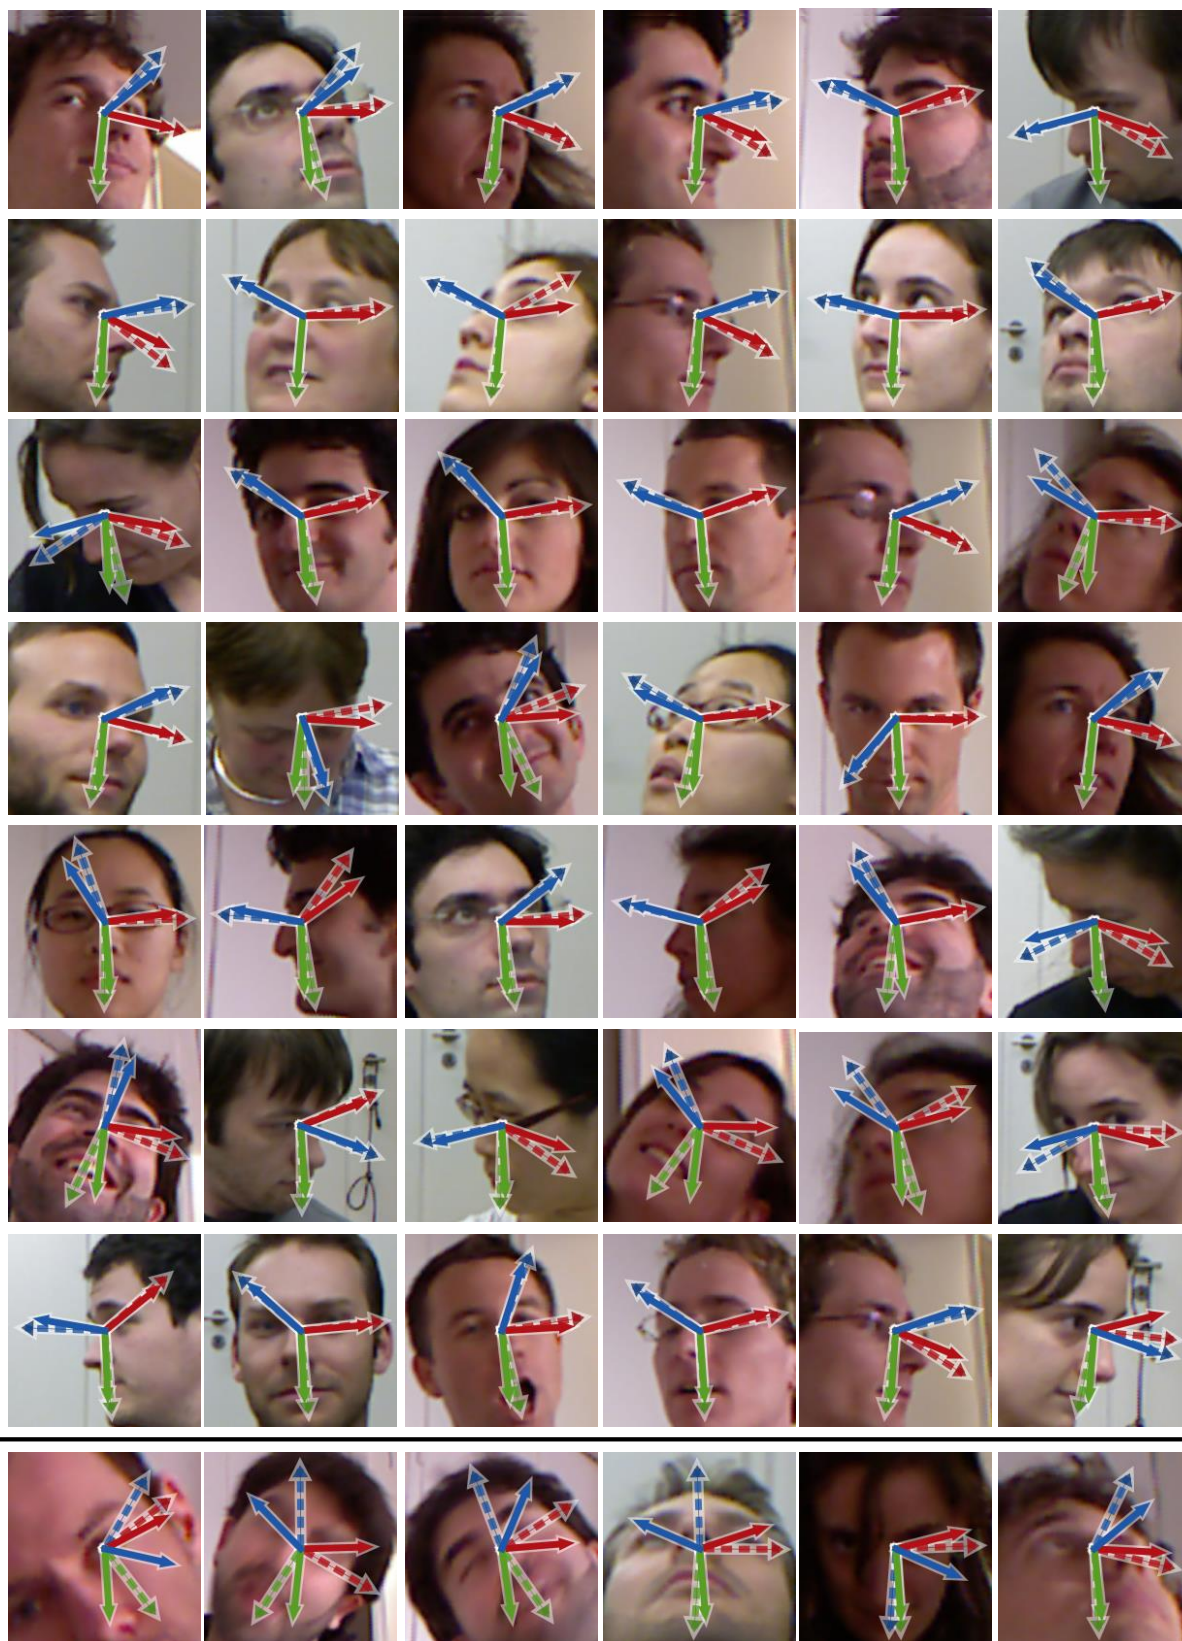

Figure 1. **Viewpoint estimation results for the face category.** SSV predicts reliable viewpoints for a variety of face poses with large variations in azimuth, elevation and tilt. The last row (below the black line) shows some erroneous cases where the faces are partially detected by the face detector or there are extreme elevation angles.



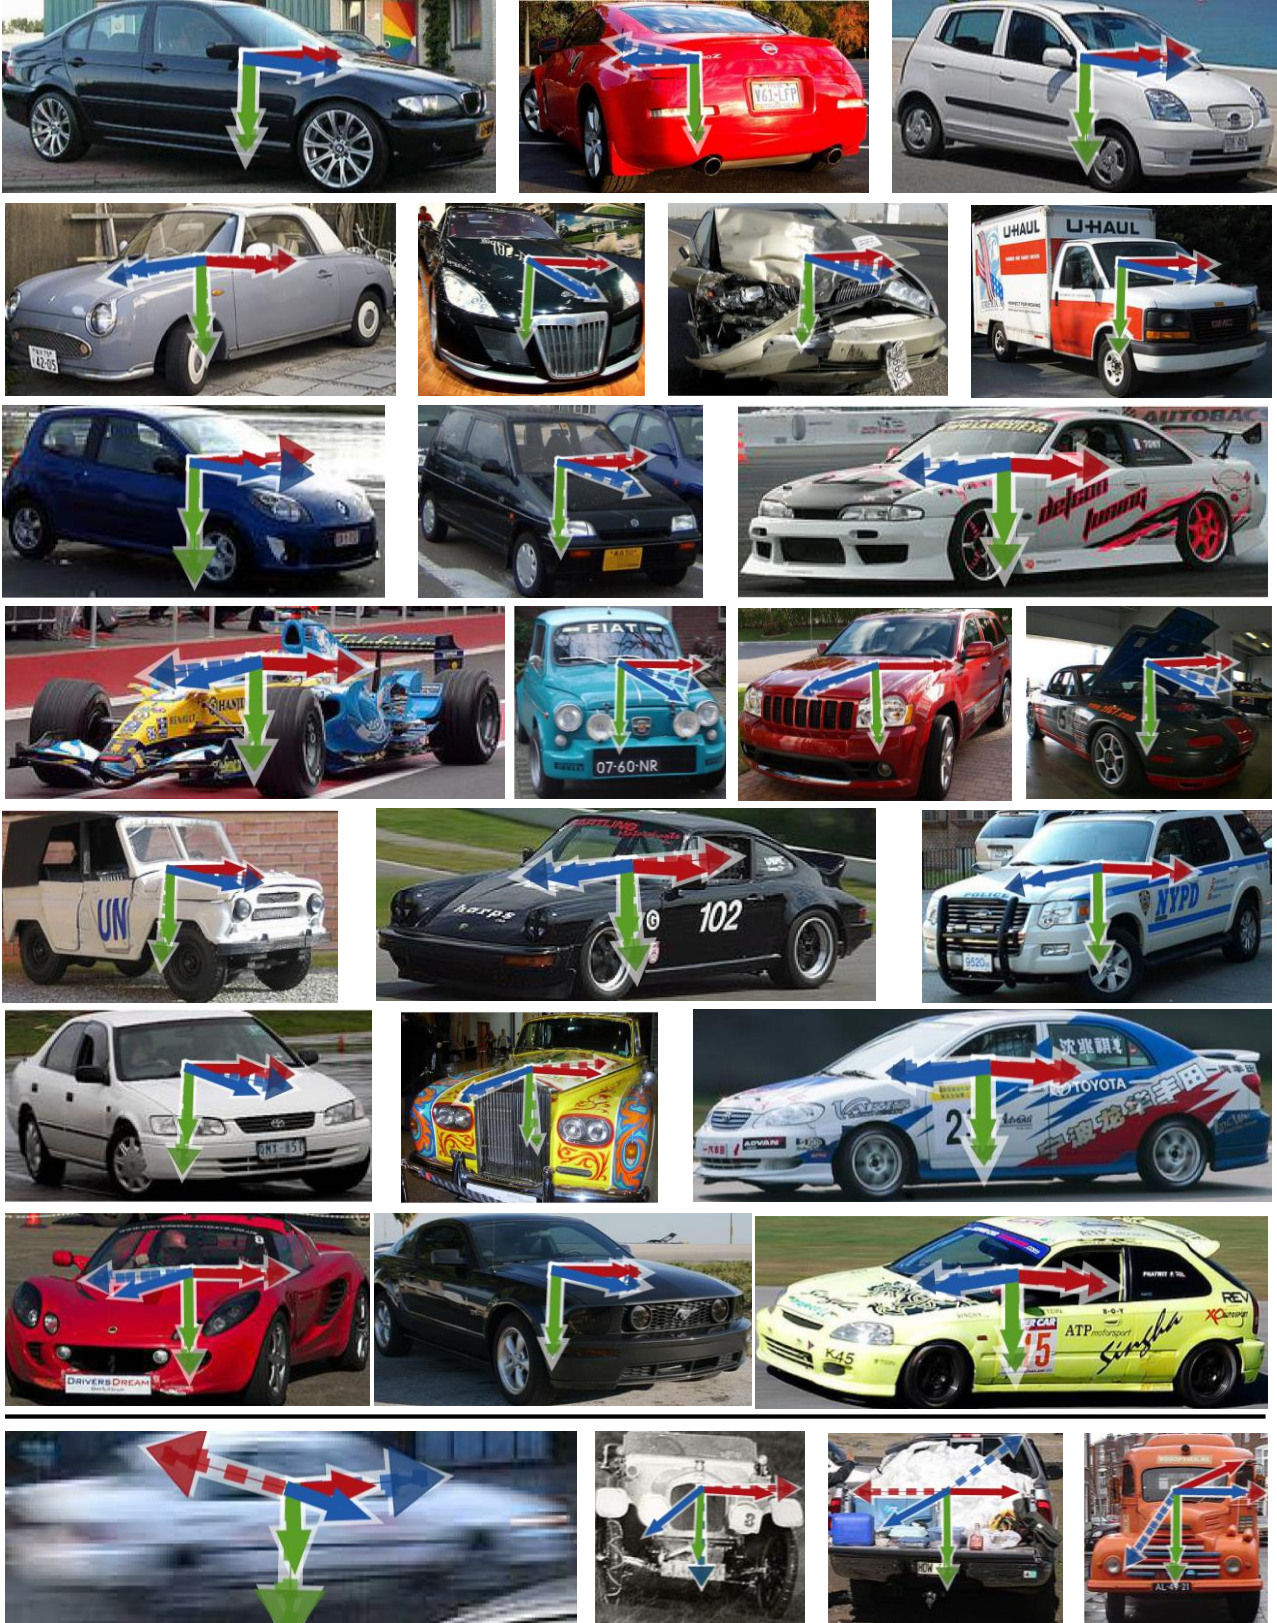

Figure 2. **Viewpoint estimation results for the car category.** SSV predicts reliable viewpoints for a variety of objects with large variations in azimuth, elevation and tilt. It generalizes to car models like race cars and formula-1 cars, which are not seen by SSV during training. The last row (below the black line) shows some erroneous cases where the objects have extreme motion blur or are heavily occluded to the extent where it is difficult to identify it as a car.



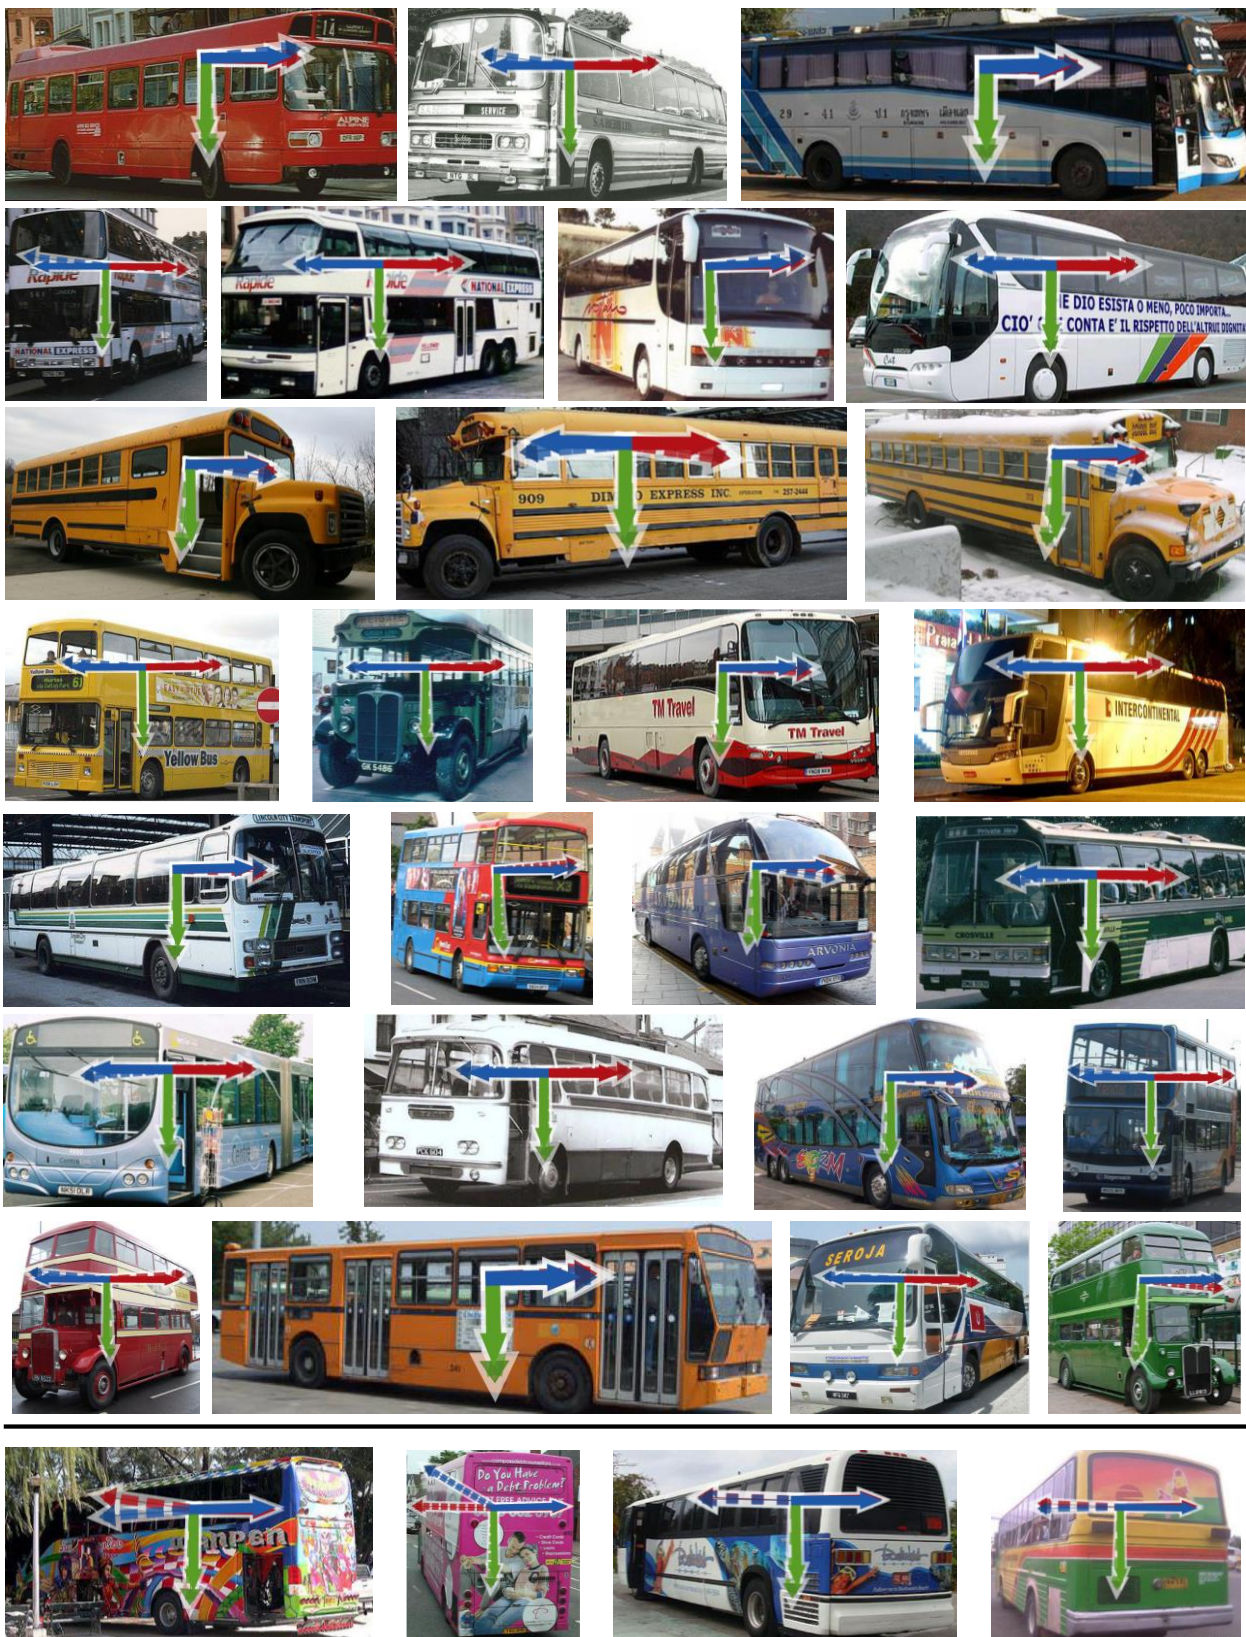

Figure 3. **Viewpoint estimation results for the bus category** . SSV predicts reliable viewpoints for a variety of buses with large variations in azimuth, elevation and tilt. The last row (below the black line) shows erroneous viewpoints when there is ambiguity between the rear and front parts of the object.



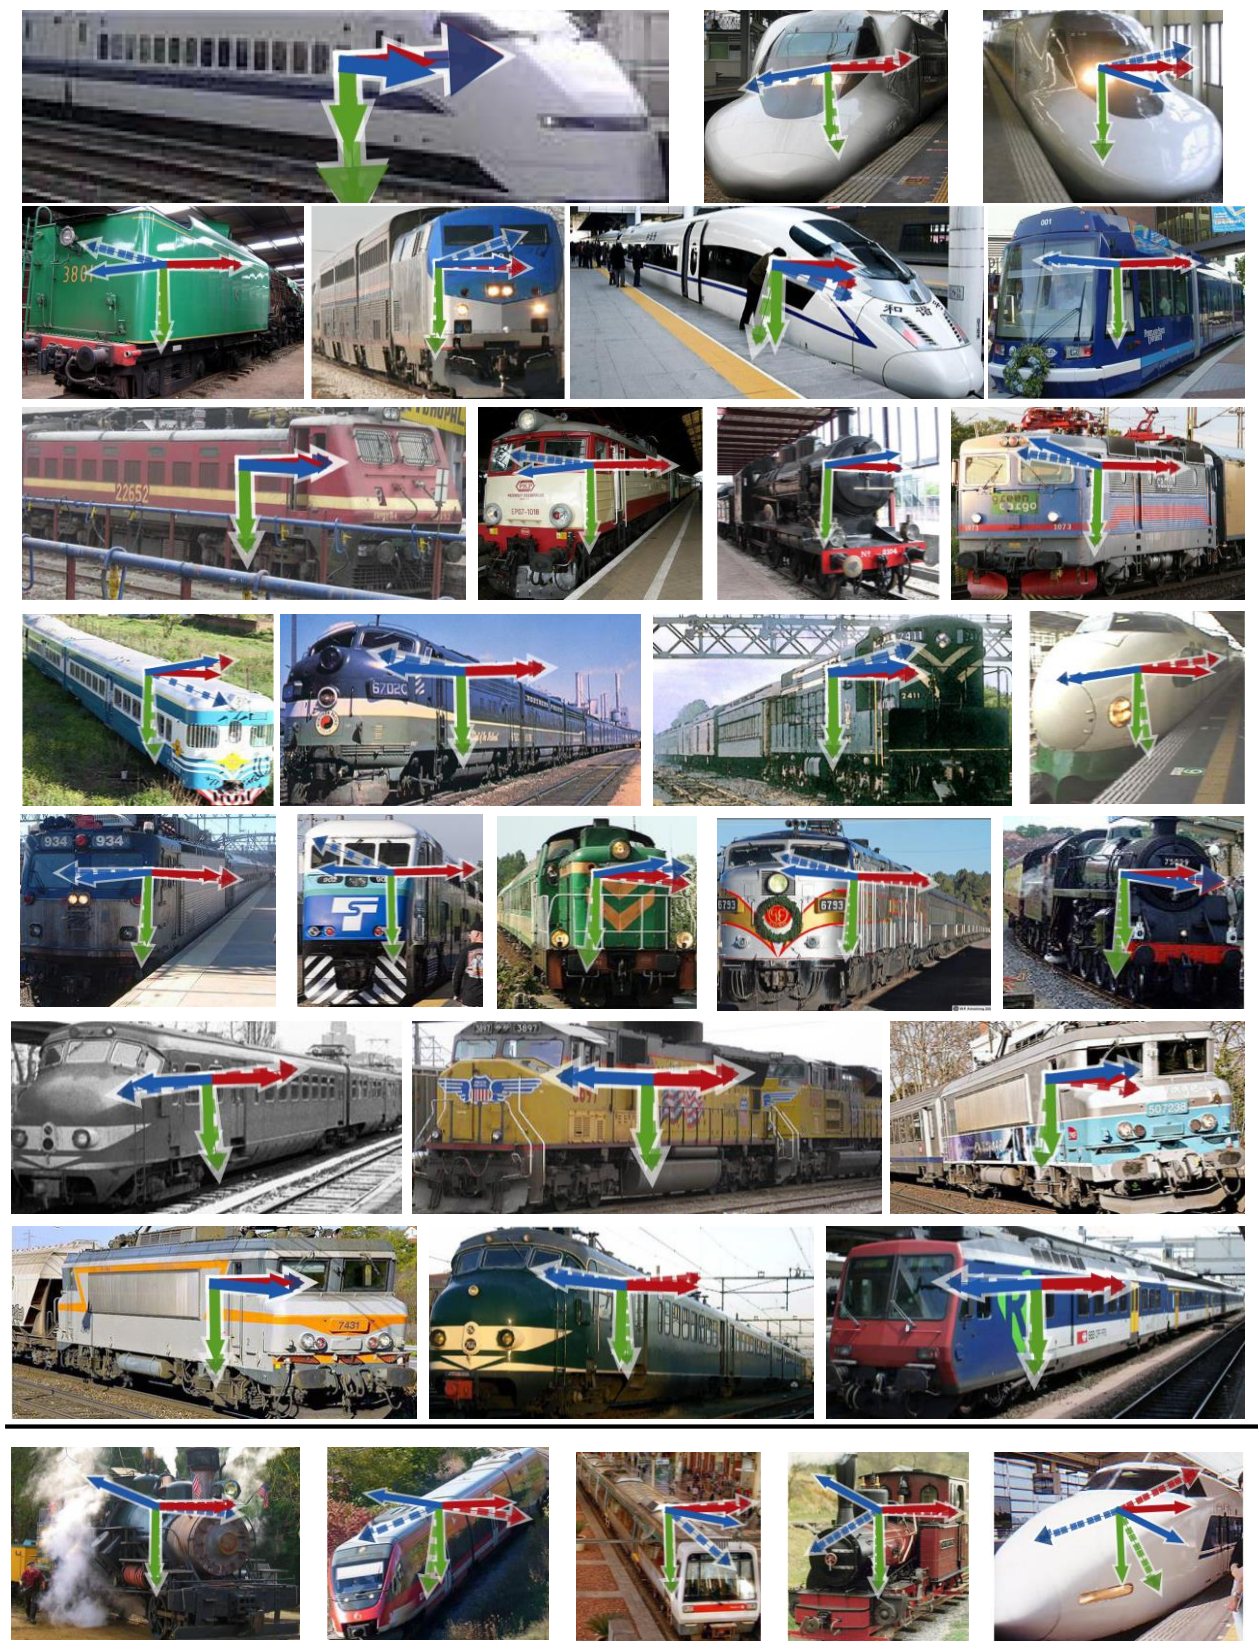

Figure 4. **Viewpoint estimation results for the train category.** SSV predicts reliable viewpoints for a variety of objects with large variations in azimuth, elevation and tilt. The last row (below the black line) shows the erroneous viewpoints predicted by SSV.

## References

- [1] Xun Huang and Serge Belongie. Arbitrary style transfer in real-time with adaptive instance normalization. In *ICCV*, 2017. [1](#), [3](#)
- [2] Diederik P. Kingma and Jimmy Ba. Adam: A method for stochastic optimization. In *ICLR*, 2015. [1](#)
- [3] Adam Paszke, Sam Gross, Soumith Chintala, Gregory Chanan, Edward Yang, Zachary DeVito, Zeming Lin, Alban Desmaison, Luca Antiga, and Adam Lerer. Automatic differentiation in PyTorch. In *NeurIPS*, 2017. [1](#)
- [4] Dmitry Ulyanov, Andrea Vedaldi, and Victor S. Lempitsky. Improved texture networks: Maximizing quality and diversity in feed-forward stylization and texture synthesis. In *CVPR*, 2017. [1](#)
